# Supplementary material
Source: Royal Society of Chemistry journal article supplement (doi:10.1039/d6dt00320f)
Supplement: d6dt00320f9.pdf [file d6dt00320f9.pdf]

# **A novel family of heteroleptic 1D chain spin-crossover complexes and its DFT modelling. How the formation of polynuclear chains modifies the ligand-field effects on spin transition**

Vladyslav Maliuzhenko,<sup>[a]</sup> Marek Weselski,<sup>[a]</sup> Maria Książek,<sup>[b]</sup> Tim Hochdörffer,<sup>[c]</sup> Juliusz A. Wolny,<sup>\*[c]</sup>  
Volker Schünemann,<sup>[c]</sup> Joachim Kusz,<sup>[b]</sup> Robert Bronisz<sup>\*[a]</sup>

---

[a] Msc V. Maliuzhenko, Dr M. Weselski, Dr R. Bronisz

Faculty of Chemistry,

University of Wrocław,

F. Joliot-Curie 14, 50-383, Wrocław, Poland

E-mail: robert.bronisz@uwr.edu.pl

[b] Dr M. Książek, Prof. J. Kusz,

Institute of Physics,

University of Silesia,

75 Pułku Piechoty 1, 41-500 Chorzów, Poland

[c] Dr T. Hochdörffer, Dr. J. A. Wolny, Prof. V. Schünemann,

Department of Physics,

RPTU Kaiserslautern-Landau,

Erwin Schrödinger Str. 46 67663 Kaiserslautern, Germany

**Table S1.** Crystallographic data for crystal structures of **1, 2, 3** and **4**.

| CCDC No.                                    | 2259411                                                                         | 2259412                                                                         | 2259413                                                                         | 2259414                                                                         | 2259415                                                                         | 2259416                                                                         | 2259417                                                                           | 2259418                                                                           |
|---------------------------------------------|---------------------------------------------------------------------------------|---------------------------------------------------------------------------------|---------------------------------------------------------------------------------|---------------------------------------------------------------------------------|---------------------------------------------------------------------------------|---------------------------------------------------------------------------------|-----------------------------------------------------------------------------------|-----------------------------------------------------------------------------------|
| Compound                                    | 1                                                                               |                                                                                 | 2                                                                               |                                                                                 | 3                                                                               |                                                                                 | 4                                                                                 |                                                                                   |
| Temperature                                 | 100 K                                                                           | 480 K                                                                           | 100 K                                                                           | 480 K                                                                           | 80 K                                                                            | 250 K                                                                           | 90 K                                                                              | 250 K                                                                             |
| Spin state                                  | LS                                                                              | HS                                                                              | LS                                                                              | HS                                                                              | LS                                                                              | HS                                                                              | HS                                                                                | HS                                                                                |
| Empirical formula                           | C <sub>20</sub> H <sub>22</sub> B <sub>2</sub> F <sub>8</sub> FeN <sub>18</sub> | C <sub>20</sub> H <sub>22</sub> B <sub>2</sub> F <sub>8</sub> FeN <sub>18</sub> | C <sub>20</sub> H <sub>22</sub> B <sub>2</sub> F <sub>8</sub> FeN <sub>18</sub> | C <sub>20</sub> H <sub>22</sub> B <sub>2</sub> F <sub>8</sub> FeN <sub>18</sub> | C <sub>24</sub> H <sub>27</sub> B <sub>2</sub> F <sub>8</sub> FeN <sub>17</sub> | C <sub>24</sub> H <sub>27</sub> B <sub>2</sub> F <sub>8</sub> FeN <sub>17</sub> | C <sub>23</sub> H <sub>28</sub> B <sub>2</sub> F <sub>8</sub> FeN <sub>16</sub> O | C <sub>23</sub> H <sub>28</sub> B <sub>2</sub> F <sub>8</sub> FeN <sub>16</sub> O |
| Formula weight                              | 744.02                                                                          | 744.02                                                                          | 744.02                                                                          | 744.02                                                                          | 783.09                                                                          | 783.09                                                                          | 773.83                                                                            | 773.83                                                                            |
| Crystal system                              | triclinic                                                                       | triclinic                                                                       | triclinic                                                                       | triclinic                                                                       | triclinic                                                                       | triclinic                                                                       | monoclinic                                                                        | monoclinic                                                                        |
| Space group                                 | <i>P</i> -1                                                                     | <i>C</i> 2/ <i>c</i>                                                              | <i>C</i> 2/ <i>c</i>                                                              |
| a/Å                                         | 7.9524(3)                                                                       | 8.2850(18)                                                                      | 8.5402(4)                                                                       | 8.872(2)                                                                        | 12.1787(8)                                                                      | 12.4510(8)                                                                      | 15.7477(8)                                                                        | 15.7542(7)                                                                        |
| b/Å                                         | 8.8207(2)                                                                       | 9.0556(10)                                                                      | 8.8402(3)                                                                       | 8.946(2)                                                                        | 12.5849(10)                                                                     | 12.5509(9)                                                                      | 12.9089(5)                                                                        | 12.9367(6)                                                                        |
| c/Å                                         | 9.9917(3)                                                                       | 10.3075(12)                                                                     | 9.8635(7)                                                                       | 10.078(2)                                                                       | 13.0995(12)                                                                     | 13.2455(10)                                                                     | 15.3724(10)                                                                       | 15.6423(9)                                                                        |
| α/°                                         | 86.989(2)                                                                       | 86.883(10)                                                                      | 84.319(5)                                                                       | 85.350(19)                                                                      | 115.979(8)                                                                      | 117.927(7)                                                                      | 90                                                                                | 90                                                                                |
| β/°                                         | 84.475(3)                                                                       | 83.973(13)                                                                      | 78.000(5)                                                                       | 74.76(2)                                                                        | 110.675(7)                                                                      | 110.260(6)                                                                      | 100.050(6)                                                                        | 100.243(5)                                                                        |
| γ/°                                         | 85.069(3)                                                                       | 83.689(14)                                                                      | 83.464(3)                                                                       | 85.05(2)                                                                        | 98.201(6)                                                                       | 95.241(5)                                                                       | 90                                                                                | 90                                                                                |
| Volume/Å <sup>3</sup>                       | 694.35(4)                                                                       | 763.7(2)                                                                        | 721.48(7)                                                                       | 767.5(3)                                                                        | 1579.6(2)                                                                       | 1633.5(2)                                                                       | 3077.0(3)                                                                         | 3137.2(3)                                                                         |
| Z                                           | 1                                                                               | 1                                                                               | 1                                                                               | 1                                                                               | 2                                                                               | 2                                                                               | 4                                                                                 | 4                                                                                 |
| ρ <sub>calc</sub> /cm <sup>3</sup>          | 1.779                                                                           | 1.618                                                                           | 1.712                                                                           | 1.610                                                                           | 1.646                                                                           | 1.592                                                                           | 1.670                                                                             | 1.636                                                                             |
| μ/mm <sup>-1</sup>                          | 0.650                                                                           | 0.591                                                                           | 5.127                                                                           | 0.588                                                                           | 4.708                                                                           | 4.553                                                                           | 0.591                                                                             | 0.579                                                                             |
| Radiation                                   | MoKα                                                                            | MoKα                                                                            | CuKα                                                                            | MoKα                                                                            | CuKα                                                                            | CuKα                                                                            | MoKα                                                                              | MoKα                                                                              |
| 2θ range for data collection/°              | 6.054 to 52.732                                                                 | 5.898 to 52.744                                                                 | 9.194 to 147.054                                                                | 6.386 to 52.74                                                                  | 8.19 to 147.11                                                                  | 7.95 to 147.564                                                                 | 6.312 to 52.744                                                                   | 6.298 to 52.744                                                                   |
| Index ranges                                | -9 ≤ h ≤ 9<br>-11 ≤ k ≤ 10<br>-12 ≤ l ≤ 11                                      | -10 ≤ h ≤ 10<br>-11 ≤ k ≤ 11<br>-12 ≤ l ≤ 11                                    | -10 ≤ h ≤ 7<br>-10 ≤ k ≤ 10<br>-12 ≤ l ≤ 11                                     | -11 ≤ h ≤ 11<br>-9 ≤ k ≤ 11<br>-12 ≤ l ≤ 12                                     | -14 ≤ h ≤ 15<br>-15 ≤ k ≤ 12<br>-16 ≤ l ≤ 16                                    | -14 ≤ h ≤ 15<br>-15 ≤ k ≤ 13<br>-16 ≤ l ≤ 16                                    | -17 ≤ h ≤ 19<br>-16 ≤ k ≤ 16<br>-19 ≤ l ≤ 19                                      | -17 ≤ h ≤ 19<br>-15 ≤ k ≤ 16<br>-19 ≤ l ≤ 19                                      |
| Reflections collected                       | 5862                                                                            | 6414                                                                            | 5085                                                                            | 6408                                                                            | 11202                                                                           | 11666                                                                           | 12632                                                                             | 26053                                                                             |
| Independent reflections                     | 2831                                                                            | 3132                                                                            | 2806                                                                            | 3140                                                                            | 6145                                                                            | 6347                                                                            | 3147                                                                              | 3210                                                                              |
| R <sub>int</sub>                            | 0.0206                                                                          | 0.0443                                                                          | 0.0125                                                                          | 0.0407                                                                          | 0.0591                                                                          | 0.0330                                                                          | 0.0397                                                                            | 0.0709                                                                            |
| R <sub>sigma</sub>                          | 0.0269                                                                          | 0.0608                                                                          | 0.0187                                                                          | 0.0552                                                                          | 0.1002                                                                          | 0.0551                                                                          | 0.0323                                                                            | 0.0403                                                                            |
| Data/restraints/parameters                  | 2831/<br>18/<br>233                                                             | 3132/<br>28/<br>232                                                             | 2806/<br>0/<br>223                                                              | 3140/<br>29/<br>252                                                             | 6145/<br>0/<br>489                                                              | 6347/<br>0/<br>495                                                              | 3147/<br>0/<br>239                                                                | 3210/<br>2/<br>238                                                                |
| Goodness-of-fit on F <sup>2</sup>           | 1.051                                                                           | 1.030                                                                           | 1.086                                                                           | 1.063                                                                           | 0.999                                                                           | 1.018                                                                           | 1.040                                                                             | 1.065                                                                             |
| Final R indexes [I >= 2σ(I)]                | R <sub>1</sub> = 0.0343<br>wR <sub>2</sub> = 0.0847                             | R <sub>1</sub> = 0.0844<br>wR <sub>2</sub> = 0.2383                             | R <sub>1</sub> = 0.0256<br>wR <sub>2</sub> = 0.0673                             | R <sub>1</sub> = 0.0879<br>wR <sub>2</sub> = 0.2489                             | R <sub>1</sub> = 0.0606<br>wR <sub>2</sub> = 0.1377                             | R <sub>1</sub> = 0.0477<br>wR <sub>2</sub> = 0.1167                             | R <sub>1</sub> = 0.0396<br>wR <sub>2</sub> = 0.1007                               | R <sub>1</sub> = 0.0641<br>wR <sub>2</sub> = 0.1690                               |
| Final R indexes [all data]                  | R <sub>1</sub> = 0.0375<br>wR <sub>2</sub> = 0.0873                             | R <sub>1</sub> = 0.1114<br>wR <sub>2</sub> = 0.2814                             | R <sub>1</sub> = 0.0257<br>wR <sub>2</sub> = 0.0675                             | R <sub>1</sub> = 0.1328<br>wR <sub>2</sub> = 0.3102                             | R <sub>1</sub> = 0.1059<br>wR <sub>2</sub> = 0.1656                             | R <sub>1</sub> = 0.0661<br>wR <sub>2</sub> = 0.1284                             | R <sub>1</sub> = 0.0503<br>wR <sub>2</sub> = 0.1083                               | R <sub>1</sub> = 0.0855<br>wR <sub>2</sub> = 0.1936                               |
| Largest diff. peak/hole / e Å <sup>-3</sup> | 0.90/<br>-0.49                                                                  | 0.93/<br>-0.57                                                                  | 0.26/<br>-0.29                                                                  | 0.49/<br>-0.39                                                                  | 0.53/<br>-0.62                                                                  | 0.50/<br>-0.41                                                                  | 0.59/<br>-0.76                                                                    | 0.90/<br>-0.46                                                                    |

**Table S2.** Selected interatomic distances (Å), angles (°) and  $\Sigma$  (°) values for compounds **1** and **2**.

| Compound<br>Temperature<br>Spin state | <b>1</b>     |              | <b>2</b>     |              |
|---------------------------------------|--------------|--------------|--------------|--------------|
|                                       | <b>480 K</b> | <b>100 K</b> | <b>480 K</b> | <b>100 K</b> |
|                                       | <b>HS</b>    | <b>LS</b>    | <b>HS</b>    | <b>LS</b>    |
| Fe-N1(py)                             | 2.1864(35)   | 2.0125(15)   | 2.1883(45)   | 2.0362(12)   |
| Fe-N14(tr <sup>py</sup> )             | 2.1379(36)   | 1.9681(15)   | 2.1307(46)   | 1.9710(12)   |
| Fe-N24(tz)                            | 2.1972(40)   | 1.9763(15)   | 2.1407(49)   | 1.9729(12)   |
| Fe-N(average)                         | 2.1738(40)   | 1.1986(15)   | 2.1532(49)   | 1.1993(12)   |
| N1(py)-Fe-N14(tr <sup>py</sup> )      | 75.27(14)    | 80.36(6)     | 76.26(17)    | 80.81(5)     |
| N1(py)-Fe-N24(tz)                     | 91.95(15)    | 91.36(6)     | 87.92(17)    | 88.31(5)     |
| N14(tr <sup>py</sup> )-Fe-N24(tz)     | 89.92(15)    | 90.06(6)     | 90.51(19)    | 90.47(5)     |
| N1(py)-C2-C15-N14(tr <sup>py</sup> )  | 9.611(17)    | 6.987(3)     | 2.324(40)    | 0.985(5)     |
| Fe1-Fe1 <sup>a</sup>                  | 10.3075(12)  | 9.9917(3)    | 10.078(2)    | 9.8635(7)    |
| Fe1-Fe1 <sup>b</sup>                  | 8.2850(18)   | 7.9524(3)    | 8.8722(24)   | 8.5402(4)    |
| Fe1-Fe1 <sup>c</sup>                  | 9.0556(10)   | 8.8207(2)    | 8.9463(23)   | 8.8402(3)    |
| $\Sigma$                              | 66.96        | 44.25        | 65.35        | 45.35        |

[a] x, y, z+1; [b] x+1, y, z; [c] x, y+1, z

**Table S3.** Selected interatomic distances (Å), angles (°) and  $\Sigma$  (°) values for compounds **3** and **4**.

| Compound<br>Temperature<br>Spin state  | <b>3</b>     |             | <b>4</b>     |             |
|----------------------------------------|--------------|-------------|--------------|-------------|
|                                        | <b>250 K</b> | <b>80 K</b> | <b>250 K</b> | <b>90 K</b> |
|                                        | <b>HS</b>    | <b>LS</b>   | <b>HS</b>    | <b>HS</b>   |
| Fe-N1(py)                              | 2.2123(22)   | 2.0200(38)  | 2.2042(30)   | 2.2091(19)  |
| Fe-N31(py)                             | 2.2342(24)   | 2.0388(37)  |              |             |
| Fe-N14(tr <sup>py</sup> )              | 2.1712(23)   | 2.0056(41)  | 2.1539(28)   | 2.1512(18)  |
| Fe-N44(tr <sup>py</sup> )              | 2.1480(23)   | 1.9836(37)  |              |             |
| Fe-N24(tz)                             | 2.1941(25)   | 1.9855(38)  | 2.1582(30)   | 2.1485(18)  |
| Fe-N54(tz)                             | 2.1615(23)   | 1.9934(39)  |              |             |
| Fe-N(average)                          | 2.1869(24)   | 2.0045(41)  | 2.1719(30)   | 2.1695(19)  |
| N1(py)-Fe-N14(tr <sup>py</sup> )       | 75.53(9)     | 80.61(16)   | 76.94(11)    | 76.96(7)    |
| N31(py)-Fe-N44(tr <sup>py</sup> )      | 75.85(9)     | 80.72(15)   |              |             |
| N1(py)-Fe-N24(tz)                      | 85.52(9)     | 87.00(15)   | 92.18(11)    | 91.76(7)    |
| N31(py)-Fe-N54(tz)                     | 87.70(9)     | 88.45(15)   |              |             |
| N14(tr <sup>py</sup> )-Fe-N24(tz)      | 95.95(10)    | 91.45(16)   | 88.74(11)    | 88.71(7)    |
| N44(tr <sup>py</sup> )-Fe-N54(tz)      | 98.04(9)     | 92.49(15)   |              |             |
| N1(py)-Fe-N31(py)                      | 102.08(9)    |             |              |             |
| N1(py)-C2-C13-N14(tr <sup>py</sup> )   | 0.019(14)    | -1.425(16)  | 11.639(5)    | 12.526(5)   |
| N31(py)-C32-C43-N44(tr <sup>py</sup> ) | 1.990(14)    | -0.991(16)  |              |             |
| Fe1-Fe1 <sup>a</sup>                   | 10.1083(14)  | 9.9547(16)  | 10.1925(3)   | 10.1812(3)  |
| Fe1-Fe1 <sup>b</sup>                   | 14.7056(13)  | 14.3967(15) |              |             |
| Fe1-Fe1 <sup>c</sup>                   | 9.9741(6)    | 9.8793(7)   |              |             |
| Fe1-Fe1 <sup>d</sup>                   | 8.5753(6)    | 8.2195(7)   |              |             |
| $\Sigma$                               | 80.48        | 47.62       | 65.99        | 64.40       |

[a] x, y, z+1; [b] x+1, y, z; [c] 1-x, -y, 1-z; [d] x, y+1, z

**Table S4.** Selected C-H...N and C-H...F interatomic contacts [ $\text{\AA}$ ] and angles [ $^\circ$ ] for **1** and **2** at 100 K and 240 K.

| Compound                                                  |          |        |          |        |                                                     |          |        |          |        |
|-----------------------------------------------------------|----------|--------|----------|--------|-----------------------------------------------------|----------|--------|----------|--------|
| 1                                                         |          |        |          |        | 2                                                   |          |        |          |        |
| Temperature                                               | 100 K    |        | 480 K    |        | Temperature                                         | 100 K    |        | 480 K    |        |
| Spin state                                                | LS       |        | HS       |        | Spin state                                          | LS       |        | HS       |        |
| <i>D-H...A</i>                                            | d(D...A) | <DHA   | d(D...A) | <DHA   | <i>D-H...A</i>                                      | d(D...A) | <DHA   | d(D...A) | <DHA   |
| <i>C6-H6(py)...N13<sup>a</sup>(tz<sup>py</sup>)</i>       | 3.153    | 140.23 |          |        | <i>C5-H5(py)...F1<sup>d</sup></i>                   |          |        | 3.171    | 117.98 |
| <i>C6-H6(py)...N14<sup>a</sup>(tz<sup>py</sup>)</i>       | 3.249    | 113.60 |          |        | <i>C5-H5(py)...F22<sup>d</sup></i>                  |          |        | 3.442    | 157.58 |
| <i>C3-H3(py)...F2A</i>                                    | 3.449    | 170.65 | 3.498    | 160.06 | <i>C6-H6(py)...F1<sup>d</sup></i>                   |          |        | 3.136    | 118.68 |
| <i>C3-H3(py)...F2B</i>                                    |          |        | 3.535    | 162.54 | <i>C6-H6(py)...N13<sup>a</sup>(tz<sup>py</sup>)</i> | 3.217    | 139.38 |          |        |
| <i>C17-H17B(alkyl)...N12<sup>b</sup>(tz<sup>py</sup>)</i> | 3.379    | 132.20 |          |        | <i>C16-H16A(alkyl)...F4I</i>                        |          |        | 3.410    | 151.87 |
| <i>C5-H5(py)...F4A<sup>c</sup></i>                        | 3.255    | 127.26 |          |        | <i>C16-H16A(alkyl)...F22</i>                        |          |        | 3.053    | 164.25 |
| <i>C5-H5(py)...F4B<sup>c</sup></i>                        | 3.224    | 126.70 | 3.302    | 135.77 | <i>C16-H16A(alkyl)...F1</i>                         | 3.433    | 146.84 |          |        |
| <i>C5-H5(py)...F4C<sup>c</sup></i>                        |          |        | 3.256    | 129.61 | <i>C16-H16A(alkyl)...F3</i>                         | 3.309    | 154.71 |          |        |
| <i>C18-H18A(alkyl)...F3<sup>d</sup></i>                   | 3.305    | 125.42 |          |        | <i>C16-H16B(alkyl)...F4<sup>b</sup></i>             |          |        | 2.866    | 111.83 |
| <i>C18-H18A(alkyl)...F1B</i>                              | 3.006    | 111.69 |          |        | <i>C16-H16B(alkyl)...F31<sup>b</sup></i>            |          |        | 3.482    | 152.55 |
| <i>C18-H18A(alkyl)...F4A<sup>c</sup></i>                  |          |        | 3.507    | 171.37 | <i>C16-H16B(alkyl)...F41<sup>b</sup></i>            |          |        | 3.102    | 110.80 |
| <i>C18-H18B(alkyl)...F4A<sup>c</sup></i>                  | 3.368    | 170.36 |          |        | <i>C17-H17A(alkyl)...F3<sup>b</sup></i>             | 3.210    | 117.40 |          |        |
| <i>C18-H18B(alkyl)...F2B<sup>c</sup></i>                  | 3.561    | 160.17 |          |        | <i>C17-H17B(alkyl)...F4<sup>b</sup></i>             |          |        | 2.996    | 127.47 |
| <i>C16-H16A(alkyl)...F1A<sup>d</sup></i>                  | 3.170    | 130.50 | 3.189    | 116.19 | <i>C18-H18A(alkyl)...F1</i>                         | 3.481    | 148.55 |          |        |
| <i>C16-H16A...F1B</i>                                     | 2.874    | 126.03 |          |        | <i>C18-H18B(alkyl)...N13(tz<sup>py</sup>)</i>       | 3.168    | 111.98 | 3.117    | 110.54 |
| <i>C16-H16A(alkyl)...F1B<sup>d</sup></i>                  |          |        | 3.319    | 132.25 | <i>C25-H25(tz)...F2<sup>c</sup></i>                 | 3.406    | 141.03 | 3.252    | 161.79 |
| <i>C16-H16A(alkyl)...F1C</i>                              |          |        | 3.150    | 128.21 | <i>C25-H25(tz)...F21<sup>c</sup></i>                |          |        | 3.167    | 143.38 |
| <i>C16-H16B(alkyl)...F2A</i>                              | 2.991    | 115.10 |          |        | <i>C25-H25(tz)...F32<sup>c</sup></i>                |          |        | 3.237    | 167.91 |
| <i>C16-H16B(alkyl)...N23(tz)</i>                          | 3.146    | 112.98 | 3.162    | 114.07 |                                                     |          |        |          |        |
| <i>C25-H25(tz)...F1A<sup>f</sup></i>                      | 3.377    | 152.34 | 3.200    | 149.05 |                                                     |          |        |          |        |
| <i>C25-H25(tz)...F2C<sup>f</sup></i>                      |          |        | 3.040    | 133.04 |                                                     |          |        |          |        |
| <i>C25-H25(tz)...F4B<sup>f</sup></i>                      | 2.731    | 122.11 |          |        |                                                     |          |        |          |        |

[a] -x+1, -y, -z+2; [b] -x+2, -y, -z+1; [c] -x, -y+1, -z+1; [d] -x+1, -y+1, -z+1; [e] x+1, y, z; [f] -x+1, -y+1, -z

[a] -x, -y, -z+1; [b] -x+1, -y+1, -z; [c] x, y, z-1; [d] x-1, y, z+1

**Table S5.** Selected C-H...N and C-H...F interatomic contacts [ $\text{\AA}$ ] and angles [ $^\circ$ ] for **3** at 80 and 250 K and for **4** at 90 and 250 K.

| Compound                                    |          |        |          |        |                                             |          |       |          |        |
|---------------------------------------------|----------|--------|----------|--------|---------------------------------------------|----------|-------|----------|--------|
| 3                                           |          |        |          |        | 4                                           |          |       |          |        |
| Temperature                                 | 80 K     |        | 250 K    |        | Temperature                                 | 90 K     |       | 250 K    |        |
| Spin state                                  | LS       |        | HS       |        | Spin state                                  | HS       |       | HS       |        |
| <i>D-H...A</i>                              | d(D...A) | <DHA   | d(D...A) | <DHA   | <i>D-H...A</i>                              | d(D...A) | <DHA  | d(D...A) | <DHA   |
| <i>C5-H5(py)...F11<sup>a</sup></i>          | 3.184    | 120.78 | 3.214    | 128.33 | <i>C6-H6(py)...F3<sup>a</sup></i>           | 3.055    | 112.6 | 3.131    | 114.18 |
| <i>C5-H5(py)...F14<sup>a</sup></i>          | 3.277    | 145.65 | 3.350    | 156.64 | <i>C15-H15(tr)...F4<sup>b</sup></i>         | 3.098    | 144.5 | 3.119    | 144.17 |
| <i>C6-H6(py)...N44<sup>b</sup>(tz)</i>      | 3.120    | 114.42 |          |        | <i>C16-H16A(alkyl)...F3<sup>c</sup></i>     | 3.352    | 154.3 | 3.417    | 158.79 |
| <i>C15-H15(tr)...N53(tz)</i>                | 3.131    | 115.28 |          |        | <i>C16-H16B(alkyl)...F4<sup>b</sup></i>     | 3.374    | 136.1 | 3.370    | 138.88 |
| <i>C16-H16A(alkyl)...F11<sup>c</sup></i>    | 3.130    | 111.09 |          |        | <i>C18-H18A(alkyl)...F2</i>                 | 3.128    | 143.3 | 3.184    | 143.49 |
| <i>C17-H17A(alkyl)...F231<sup>d</sup></i>   | 3.423    | 151.98 | 3.431    | 147.66 | <i>C18-H18B(alkyl)...F4<sup>b</sup></i>     | 3.404    | 145.5 |          |        |
| <i>C18-H18B(alkyl)...F211</i>               | 3.204    | 123.66 | 3.186    | 130.15 | <i>C25-H25(tz)...F1</i>                     | 3.128    | 153.8 | 3.139    | 154.54 |
| <i>C25-H25(tz)...F23<sup>d</sup></i>        | 3.149    | 136.13 | 3.184    | 137.71 | <i>C99-H99B(MeOH)...N21<sup>c</sup>(tz)</i> | 3.279    | 140.9 |          |        |
| <i>C25-H25(tz)...F24<sup>d</sup></i>        | 3.346    | 137.91 | 3.389    | 145.47 | <i>C99-H99B(MeOH)...N22<sup>c</sup>(tz)</i> | 3.502    | 154.9 |          |        |
| <i>C25-H25(tz)...F211<sup>d</sup></i>       | 3.309    | 166.47 | 3.479    | 164.84 | <i>C99-H99A(MeOH)...N11(tr)</i>             | 3.650    | 170.8 |          |        |
| <i>C25-H25(tz)...F231<sup>d</sup></i>       | 3.270    | 136.09 | 3.046    | 138.66 | <i>C99-H99A(MeOH)...N12(tr)</i>             | 3.053    | 156.9 | 3.175    | 119.61 |
| <i>C35-H35(py)...N52<sup>e</sup>(tz)</i>    | 3.159    | 126.41 | 3.252    | 128.13 |                                             |          |       |          |        |
| <i>C35-H35(py)...F21<sup>e</sup></i>        | 3.232    | 129.11 | 3.281    | 138.48 |                                             |          |       |          |        |
| <i>C35-H35(py)...F211<sup>e</sup></i>       | 3.369    | 136.39 |          |        |                                             |          |       |          |        |
| <i>C45-H45(tr)...N23<sup>f</sup>(tz)</i>    | 3.066    | 114.83 | 3.210    | 120.72 |                                             |          |       |          |        |
| <i>C46-H46A(alkyl)...F21<sup>g</sup></i>    | 3.496    | 158.81 | 3.422    | 151.18 |                                             |          |       |          |        |
| <i>C46-H46A(alkyl)...F22<sup>g</sup></i>    | 3.110    | 110.81 |          |        |                                             |          |       |          |        |
| <i>C46-H46A(alkyl)...F221<sup>g</sup></i>   | 3.085    | 133.05 | 3.098    | 124.93 |                                             |          |       |          |        |
| <i>C47-H47B(alkyl)...F23</i>                | 3.268    | 129.12 |          |        |                                             |          |       |          |        |
| <i>C47-H47B(alkyl)...F221</i>               | 3.183    | 116.42 | 3.226    | 119.50 |                                             |          |       |          |        |
| <i>C48-H48A(alkyl)...F13</i>                | 3.145    | 158.07 | 3.238    | 159.50 |                                             |          |       |          |        |
| <i>C48-H48B(alkyl)...F11<sup>b</sup></i>    | 3.238    | 120.86 |          |        |                                             |          |       |          |        |
| <i>C55-H55(tr)...F14</i>                    | 3.167    | 161.86 | 3.266    | 167.84 |                                             |          |       |          |        |
| <i>C98-H98A(MeCN)...N12<sup>d</sup>(tr)</i> | 3.540    | 150.97 |          |        |                                             |          |       |          |        |
| <i>C98-H98A(MeCN)...F22</i>                 | 3.208    | 117.46 | 3.294    | 125.50 |                                             |          |       |          |        |
| <i>C98-H98A(MeCN)...F231</i>                | 3.189    | 116.58 | 3.316    | 130.14 |                                             |          |       |          |        |
| <i>C98-H98C(MeCN)...F12</i>                 | 3.042    | 116.21 | 3.130    | 118.01 |                                             |          |       |          |        |

[a] -x, -y, -z+1; [b] -x+1, -y, -z+1; [c] x, y+1, z;  
[d] -x, -y, -z; [e] x, y-1, z; [f] x+1, y, z+1; [g] -x+1, -y, -z

[a] -x+1/2, y+1/2, -z-1/2; [b] x, -y, z+1/2; [c] -x+1/2, -y-1/2, -z

**Table S6.** Comparison between the calculated and experimentally determined Fe-N bond distances (in Å) for the central Fe1 in **1-4**.

| Compound                  | 1     |       |       |       | 2     |       |       |       |
|---------------------------|-------|-------|-------|-------|-------|-------|-------|-------|
| Spin state                | HS    |       | LS    |       | HS    |       | LS    |       |
| Fe-N / Å                  | Exp.  | Calc. | Exp.  | Calc. | Exp.  | Calc. | Exp.  | Calc. |
| Fe-N1(py)                 | 2.186 | 2.152 | 2.013 | 2.018 | 2.188 | 2.202 | 2.036 | 2.043 |
| Fe-N14(tz <sup>py</sup> ) | 2.138 | 2.126 | 1.968 | 1.980 | 2.131 | 2.136 | 1.971 | 1.969 |
| Fe-N24(tz)                | 2.197 | 2.185 | 1.976 | 1.993 | 2.141 | 2.160 | 1.973 | 1.981 |
| Fe-N(aver.)               | 2.174 | 2.154 | 1.986 | 1.997 | 2.153 | 2.166 | 1.199 | 1.998 |
| Compound                  | 3     |       |       |       | 4     |       |       |       |
| Spin state                | HS    |       | LS    |       | HS    |       | LS    |       |
| Fe-N / Å                  | Exp.  | Calc. | Exp.  | Calc. | Exp.  | Calc. | Exp.  | Calc. |
| Fe-N1(py)                 | 2.212 | 2.166 | 2.020 | 2.028 | 2.204 | 2.232 |       | 2.014 |
| Fe-N31(py)                | 2.234 | 2.231 | 2.039 | 2.037 |       |       |       |       |
| Fe-N14(tr <sup>py</sup> ) | 2.171 | 2.135 | 2.006 | 1.974 | 2.154 | 2.183 |       | 2.008 |
| Fe-N44(tr <sup>py</sup> ) | 2.148 | 2.084 | 1.984 | 1.978 |       |       |       |       |
| Fe-N24(tz)                | 2.194 | 2.226 | 1.986 | 1.987 | 2.158 | 2.154 |       | 1.952 |
| Fe-N54(tz)                | 2.162 | 2.191 | 1.993 | 1.981 |       |       |       |       |
| Fe-N(aver.)               | 2.187 | 2.172 | 2.005 | 1.998 | 2.172 | 2.190 |       | 1.991 |

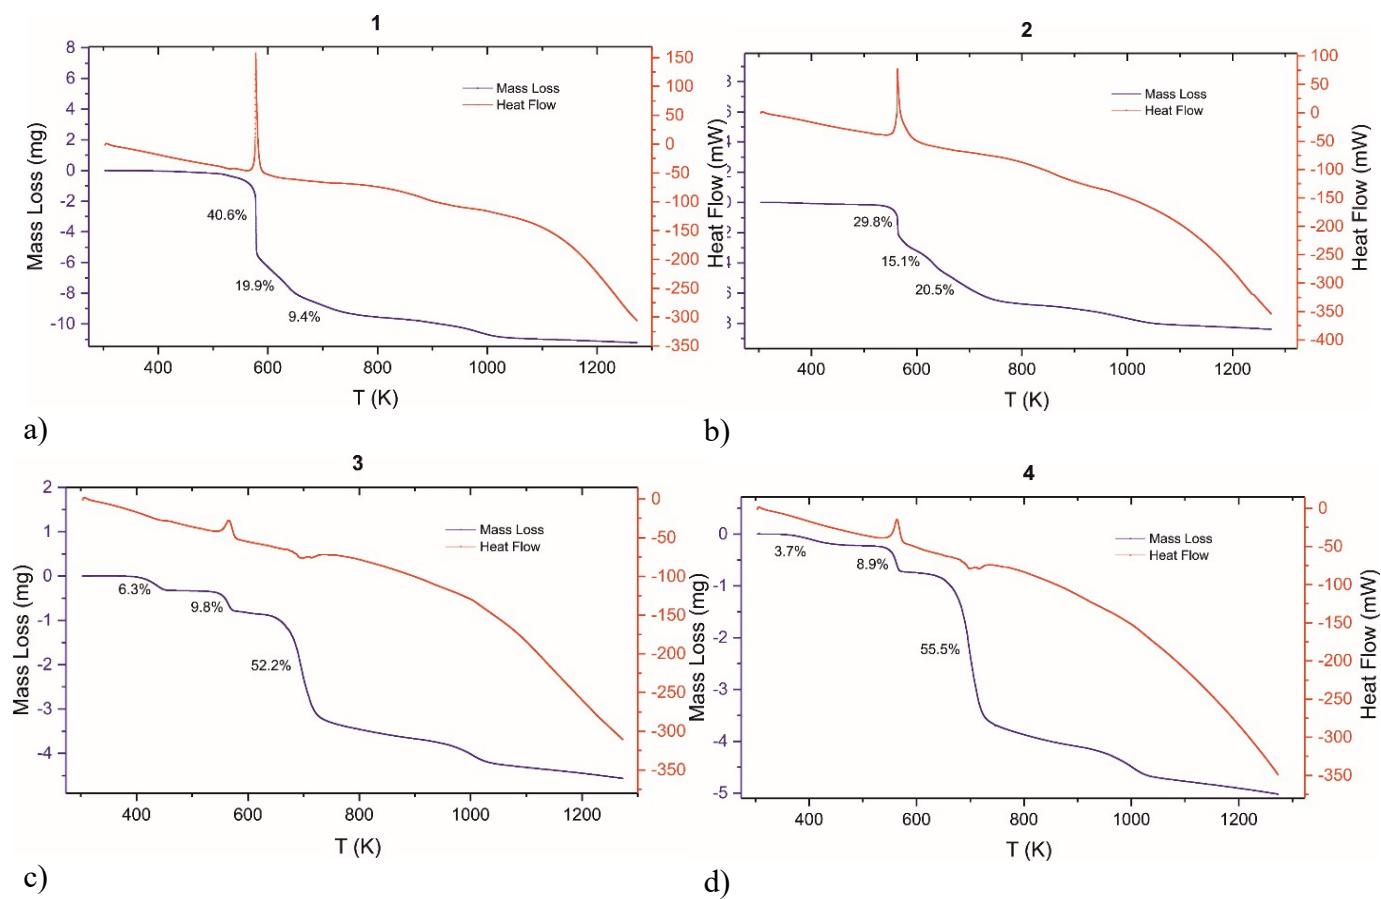

**Figure S1.** Results of thermogravimetry analysis for complexes **1** (a), **2** (b), **3** (c), **4** (d).

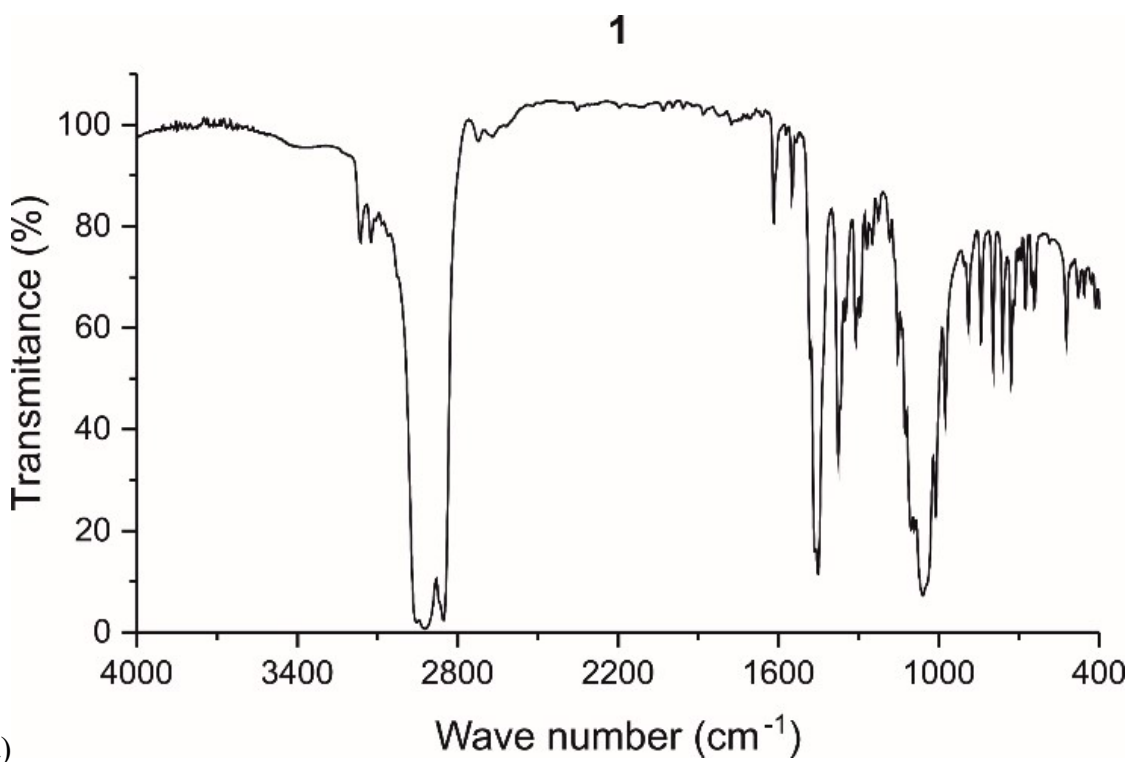

a)

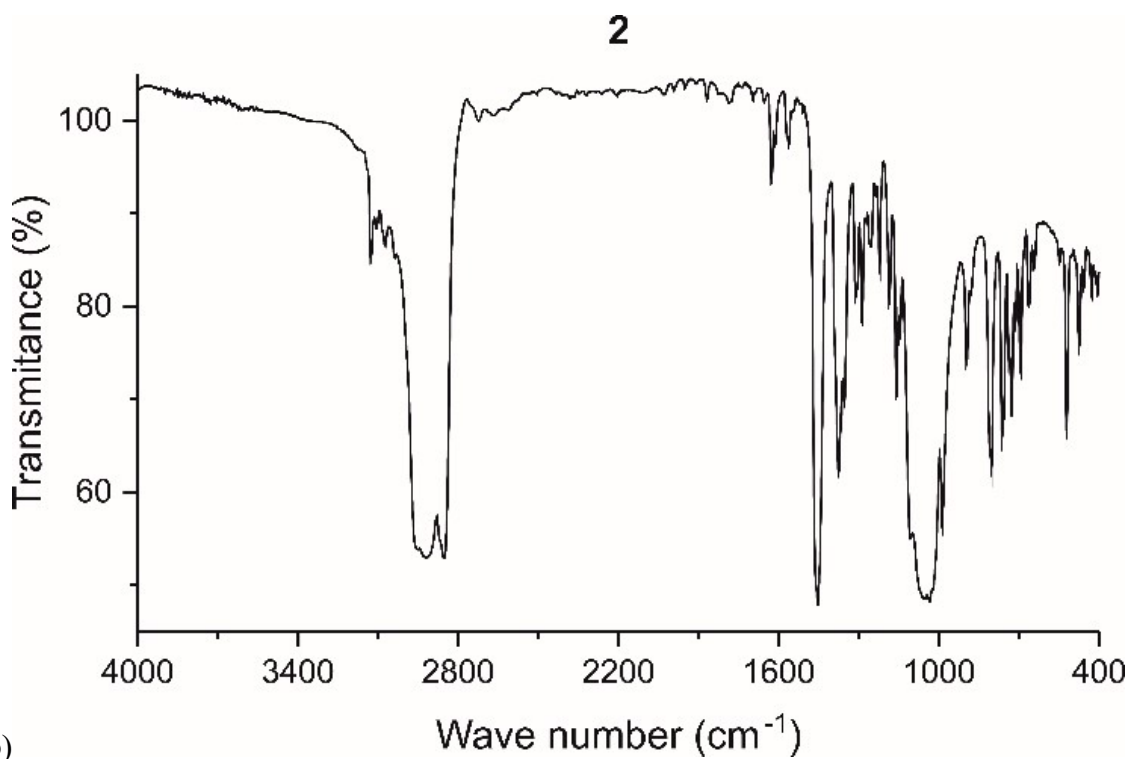

b)

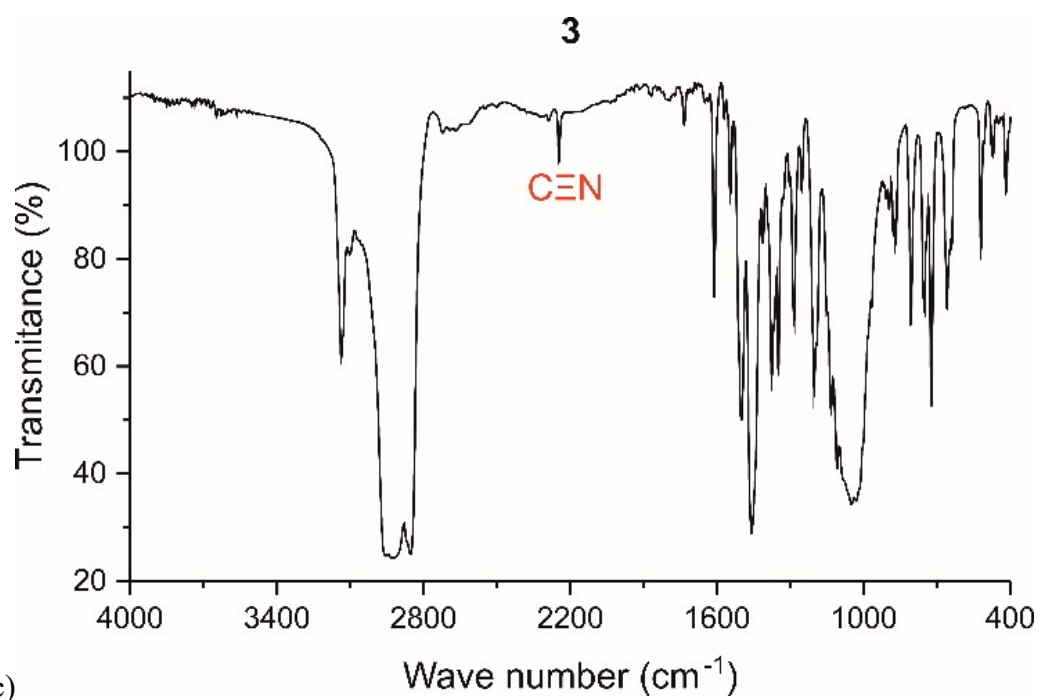

c)

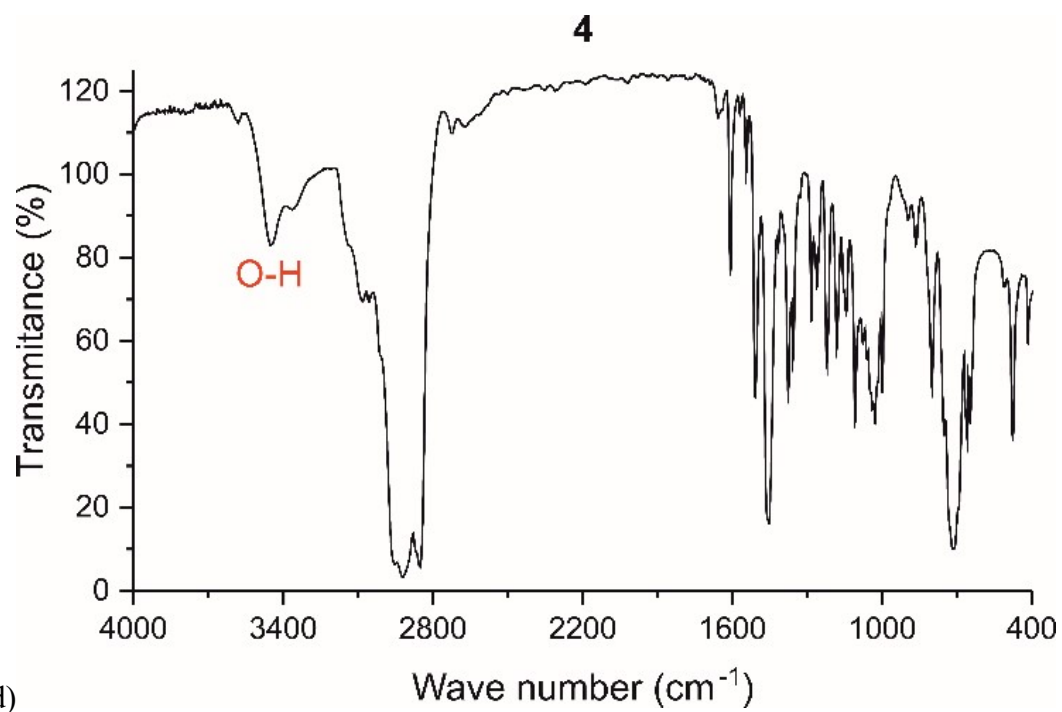

d)

**Figure S2.** FTIR spectra of **1** (a), **2** (b), **3** (c) and **4** (d) at RT (Nujol).

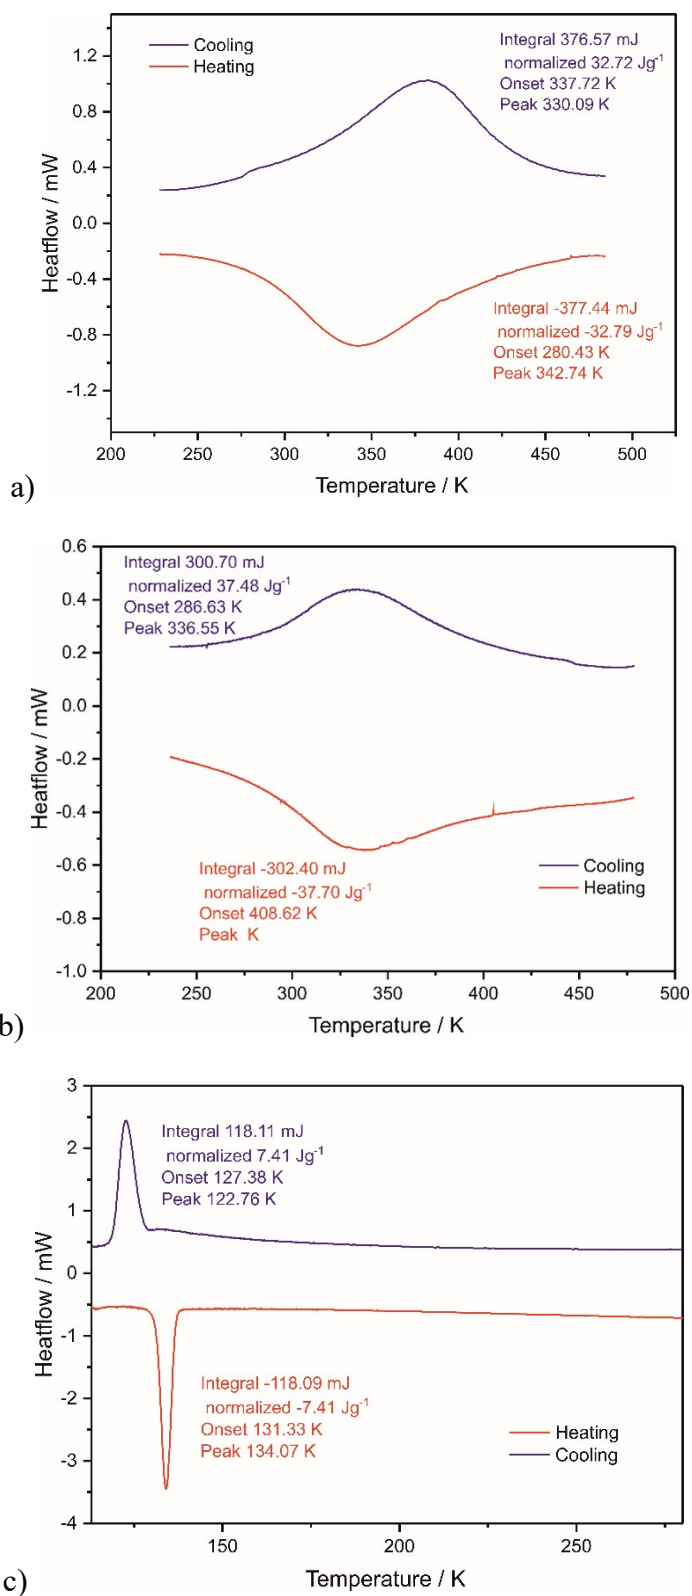

**Figure S3.** Results of DSC studies for **1** (a), **2** (b) and **3** (c).

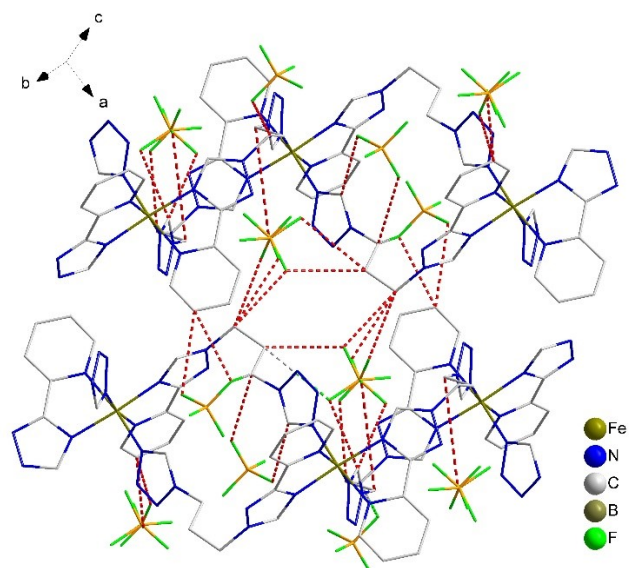

a)

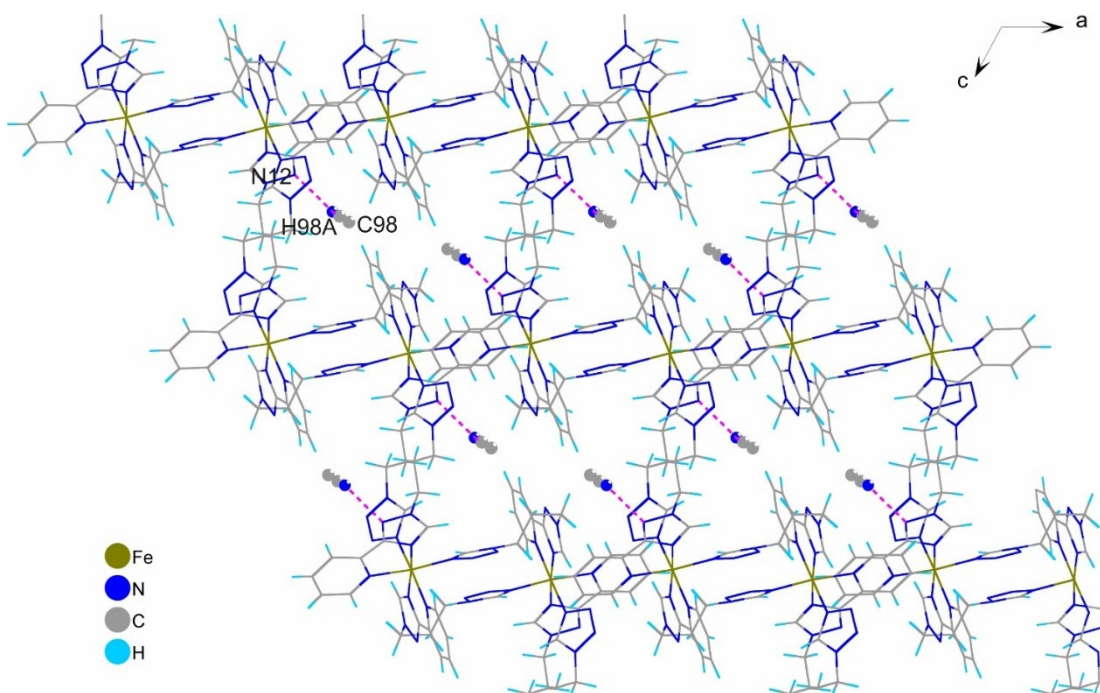

b)

**Figure S4.** Intermolecular contacts involving polymeric skeletons and anions (a) as well as noncoordinated acetonitrile molecules (b) in **3**.

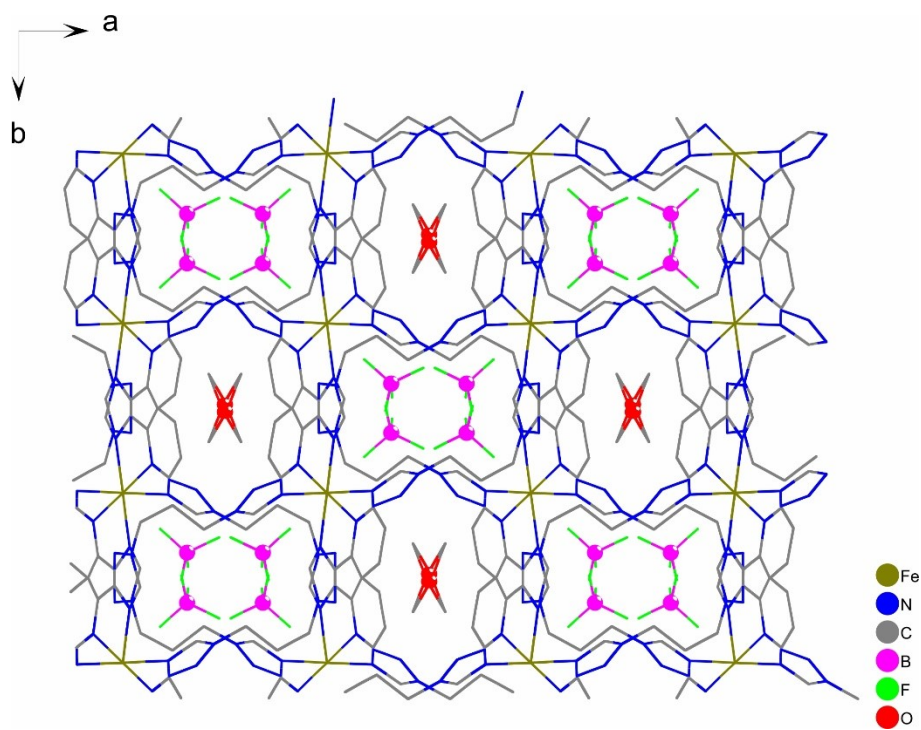

**Figure S5.** View along *c* direction showing perpendicular arrangement of chains forming adjusted layers in **4**.

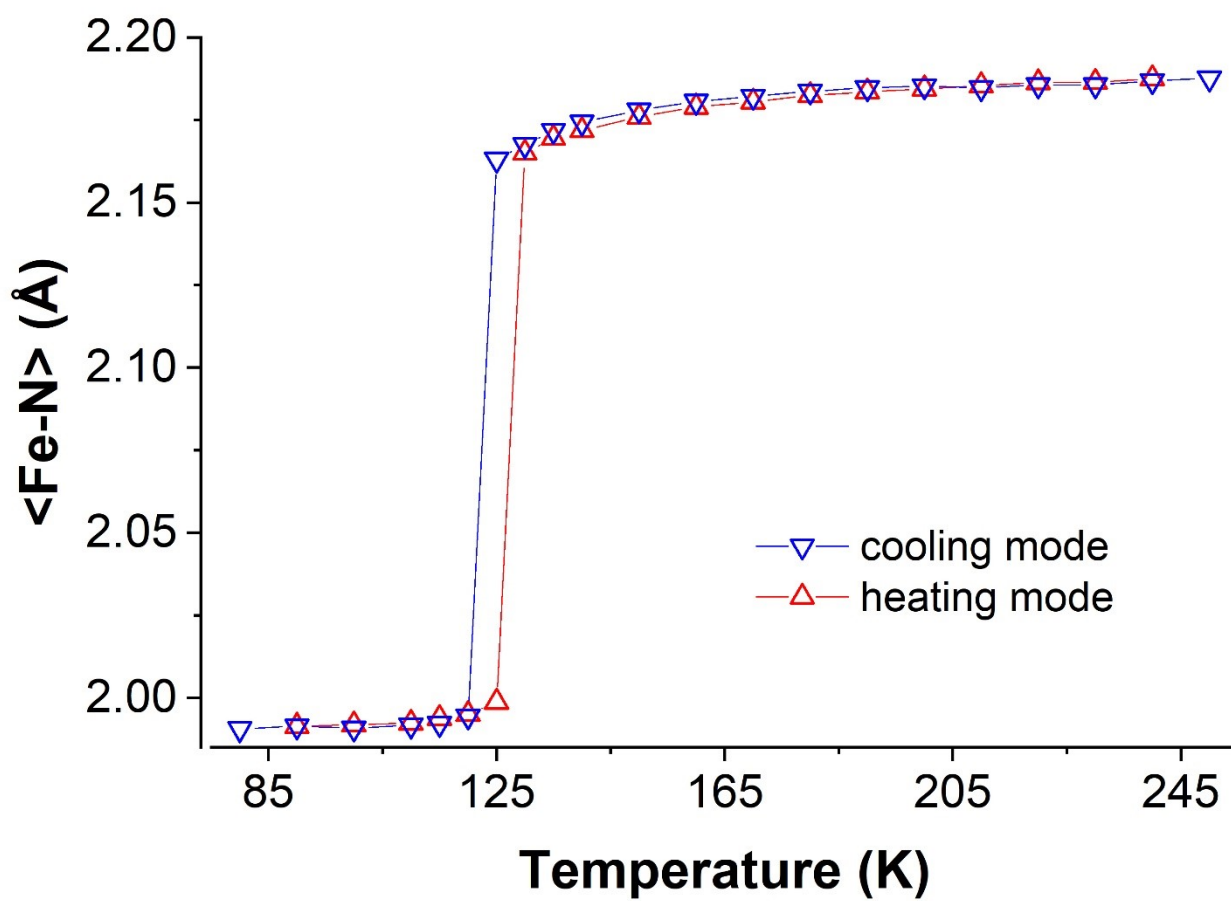

**Figure S6.** Temperature dependence of average  $\langle \text{Fe-N} \rangle$  distances in **3**.

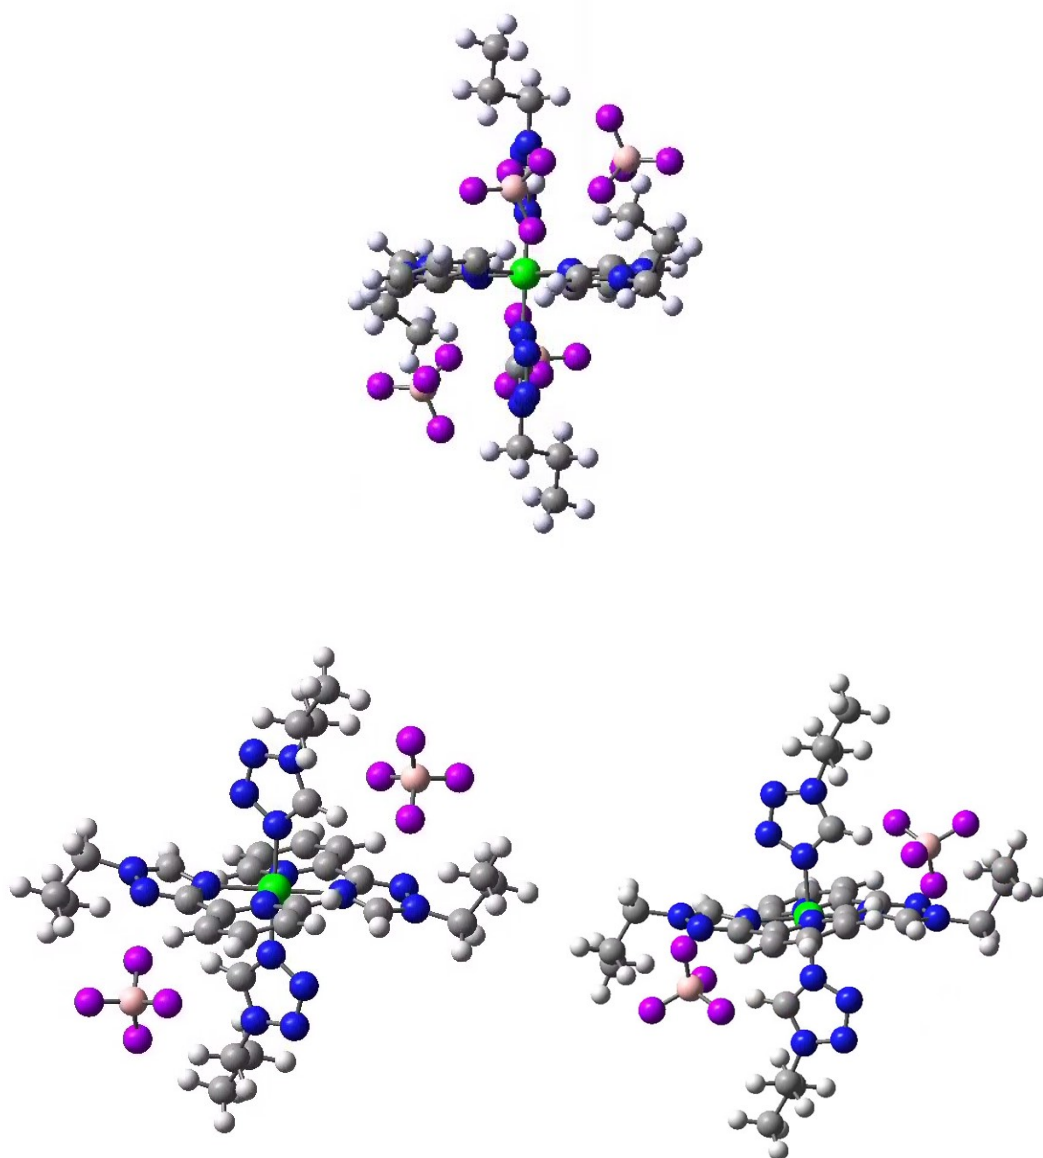

**Figure S7.** *Dist* (left) and *prox* (right) geometries of the FeN<sub>6</sub>-dication – BF<sub>4</sub><sup>-</sup> unit for the model of **4**. The orientation for the LS isomer is shown. The molecule of the complex with four anions around is shown on the top.

**Thermodynamic effects of vibrations in low-spin and high-spin state.** Here we consider the entropic and energetic effects of the vibrations, show the temperature dependence of estimated free enthalpy of the spin transition and analyse the contributions of modes of different energy regions to the vibrational entropy. The calculated temperature dependence of the vibrational entropy is shown in Figure 9. One clear conclusion is that within the complexes with *trans*-coordinated tetrazoles, it is the complex **1** for which the vibrational contribution to entropy at  $T_{1/2} = 350$  K is ca.  $100 \text{ J}\cdot\text{K}^{-1}\cdot\text{mol}^{-1}$  higher than that for **2**. Thus, although the ligand

field reflected in the value of  $E_{el}$  for **1** is higher than that for **2**, there is an additional entropic stabilisation of the HS-state of **1**. The  $\Delta S_{vib}$  for the HS-only complex **4** lies between those for **1** and **2** and is ca.  $50 \text{ J}\cdot\text{K}^{-1}\cdot\text{mol}^{-1}$  higher at  $T = 100 \text{ K}$  than that for the model of its *zig-zag cis*-coordinated polymorph **3**.

The contribution of the vibrational energy to the spin transition energy may be given quantitatively as zero-point correction (ZPE), i.e. the difference of the vibrational energy at  $0 \text{ K}$ , and the thermal contribution to energy ( $\Delta E_{vib}$ ) at  $298.15 \text{ K}$ . If one considers only the metal-ligand vibrations the  $\Delta E_{vib}$  corresponding to the LS  $\rightarrow$  HS transition shall be negative as the vibrations for the LS isomer occur at higher energy than those of the HS isomer. On the other hand, with the increase of temperature these are the excited vibrational states of the HS isomer which are more effectively populated and the vibrational contribution becomes less negative. In consequence, the sum of the electronic and the vibrational contribution to the spin transition enthalpy increases with temperature. In our case the values of  $ZPE/\Delta E_{vib}$  ( $ZPE =$  zero point energy or zero-point correction) are  $-52/-30$ ,  $-56/-39$ ,  $-44/-24$  and  $-46/-24 \text{ kJ}\cdot\text{mol}^{-1}$  for the pentanuclear models **1**, **2**, **3** and **4**, respectively, making a significant contribution to the energy of spin transitions.

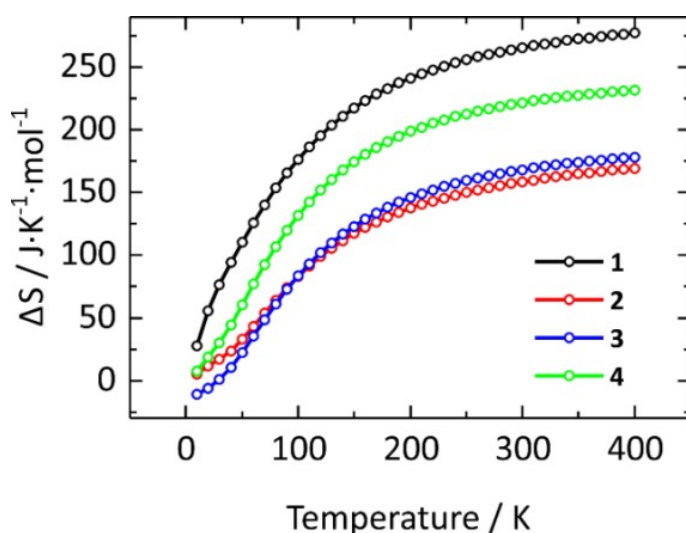

**Figure S8.** Calculated (B3LYP/CEP-31G, dispersion correction) vibrational entropies as a function of  $T$  for the pentanuclear models of the complexes under study. The solid line is a guide for the eye.

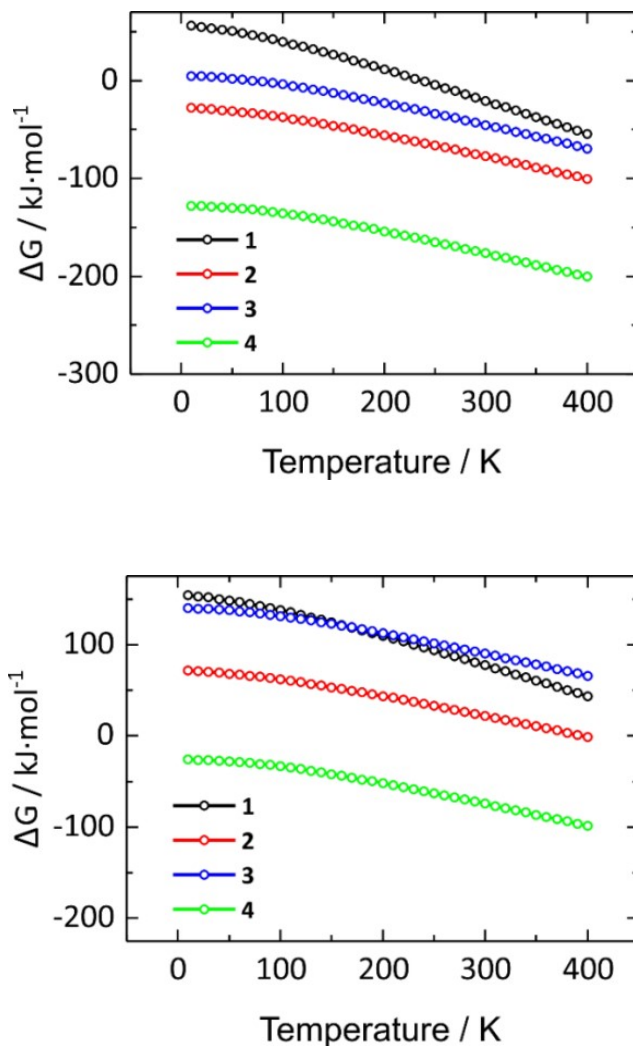

**Figure S9.** Calculated free enthalpy of the full (five Fe(II) centres) spin transition in pentanuclear models of the complexes under study. Top: the results for the structures optimised with B3LYP/CEP-31G and dispersion correction. Bottom: the results for the same geometries calculated with B3LYP\*/CEP-31G (no dispersion correction). The solid line is a guide for the eye

The obtained temperature-dependent values of the vibrational entropy  $\Delta S_{\text{vib}}$  and energy differences  $\Delta E_{\text{vib}}$  were used to calculate the temperature dependencies of the free enthalpy of the spin-transition  $\Delta G$  shown in Fig. S9. They illustrate the influence of the vibrational effects on the thermodynamics of the spin transition

It seems that entropic effects fairly compensate the difference in  $E_{\text{el}}$  between **1** and **2** and additionally stabilise the HS-state of **4**.
